# Supplementary material for: A novel synthetic approach of cerium oxide nanoparticles with improved biomedical activity
Source: PubMed Central journal article supplement (PMC5498533; doi:10.1038/s41598-017-04098-6), 2017-07-05
Supplement: 41598_2017_4098_MOESM1_ESM.pdf [file 41598_2017_4098_MOESM1_ESM.pdf]

## Supplementary Information

### A novel synthetic approach of cerium oxide nanoparticles with improved biomedical activity

Fanny Caputo,<sup>1,2</sup> Marta Mameli,<sup>3</sup> Andrzej Sienkiewicz,<sup>4</sup> Silvia Licoccia,<sup>1</sup> Francesco Stellacci,<sup>3</sup> Lina Ghibelli,<sup>2</sup> Enrico Traversa<sup>1,5,\*</sup>

<sup>1</sup> Dipartimento di Scienze e Tecnologie Chimiche, Università di Roma Tor Vergata, 00133 Roma, Italy

<sup>2</sup> Dipartimento di Biologia, Università di Roma Tor Vergata, 00133 Roma, Italy

<sup>3</sup> Institute of Materials, Ecole Polytechnique Fédérale de Lausanne, 1015 Lausanne, Switzerland

<sup>4</sup> Institute of Physics, École Polytechnique Fédérale de Lausanne, 1015 Lausanne, Switzerland

<sup>5</sup> International Research Center for Renewable Energy, Xi'an Jiaotong University, 710049 Xi'an, Shaanxi, China

\* [traversa@uniroma2.it](mailto:traversa@uniroma2.it)

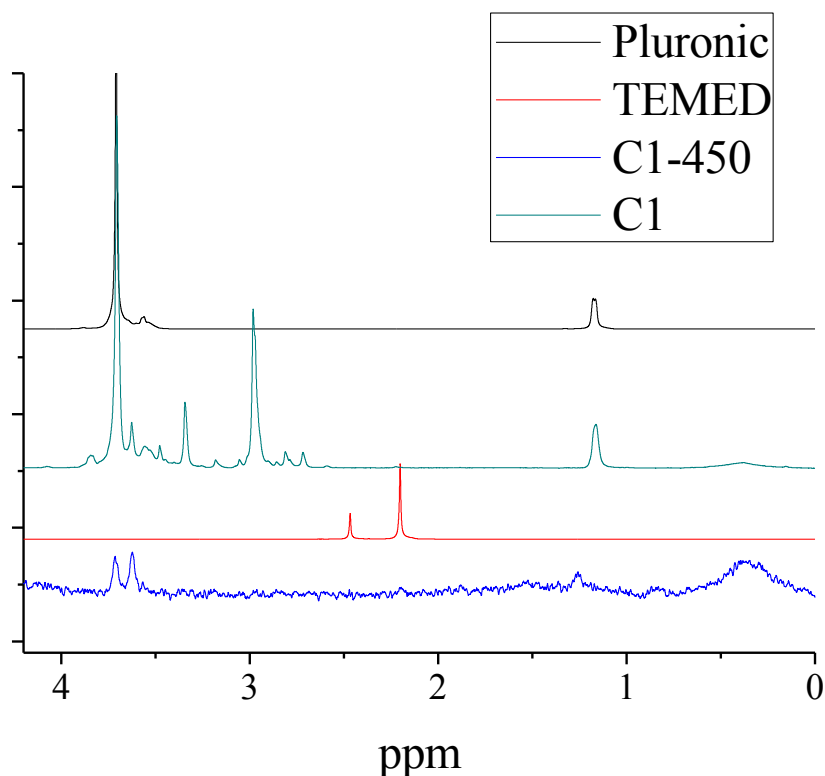

**Figure S1.** <sup>1</sup>H-NMR surface characterization of C1. C1 <sup>1</sup>H-NMR spectrum compared with Pluronic F127, TEMED spectra and C1-450 NPs.

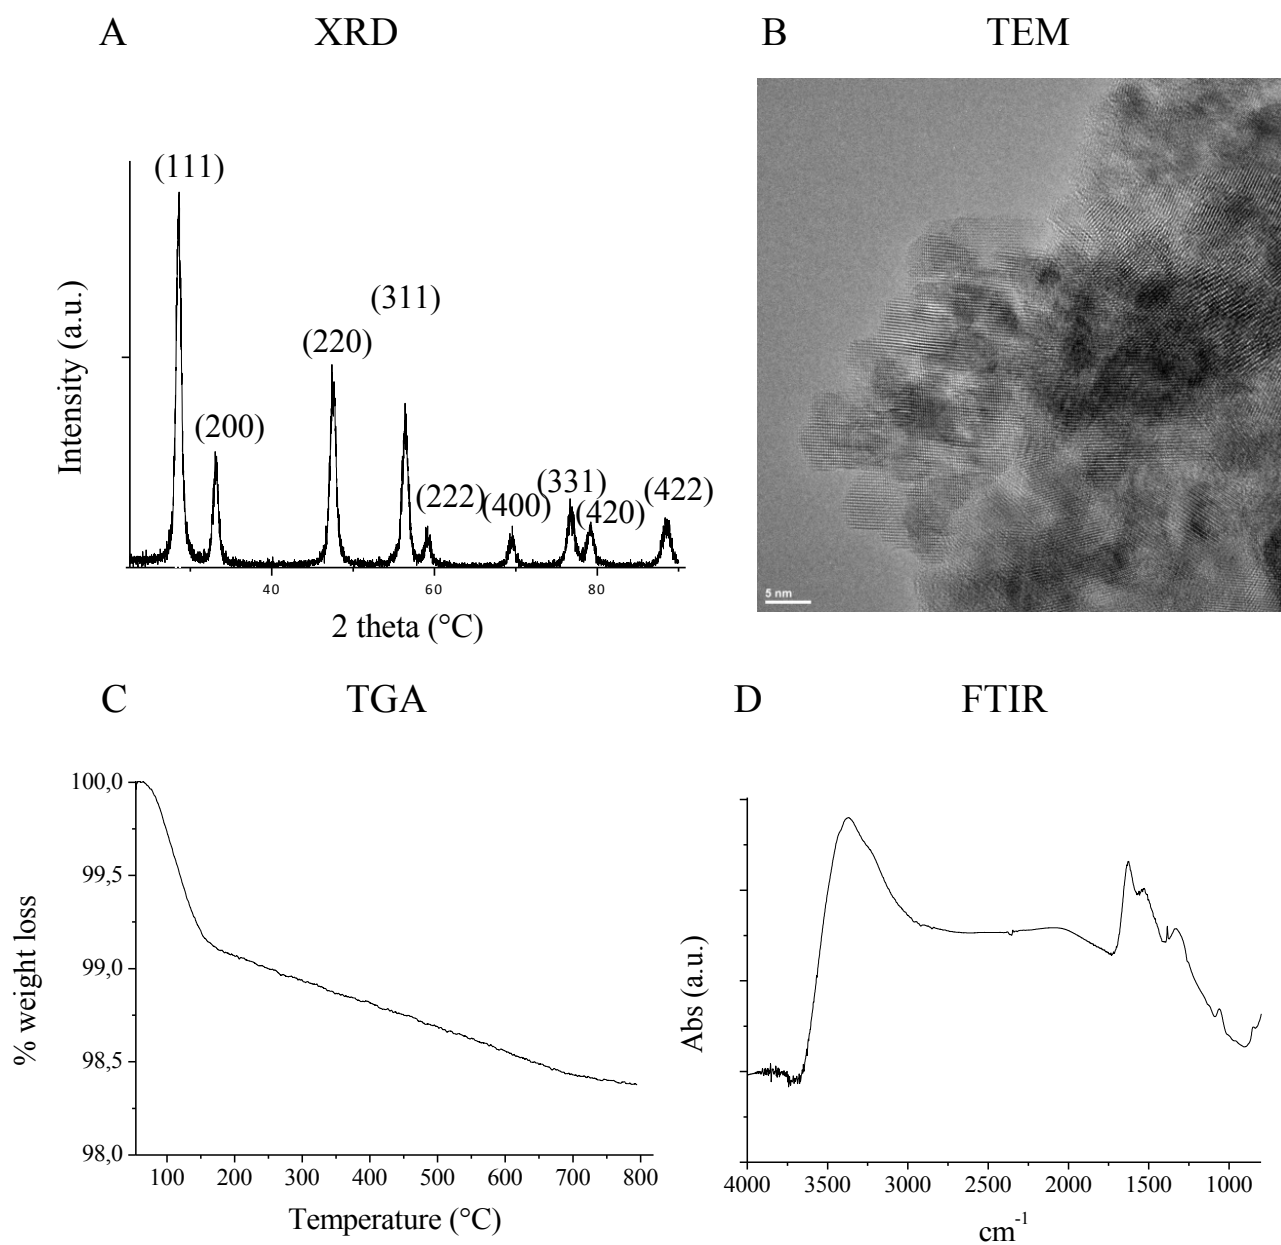

**Figure S2. C1-450 Physico-chemical characterization.** (A) XRD diffraction patterns and Miller indexes. (B) TEM image. (C) TGA curve. (D) FTIR absorbance spectra.

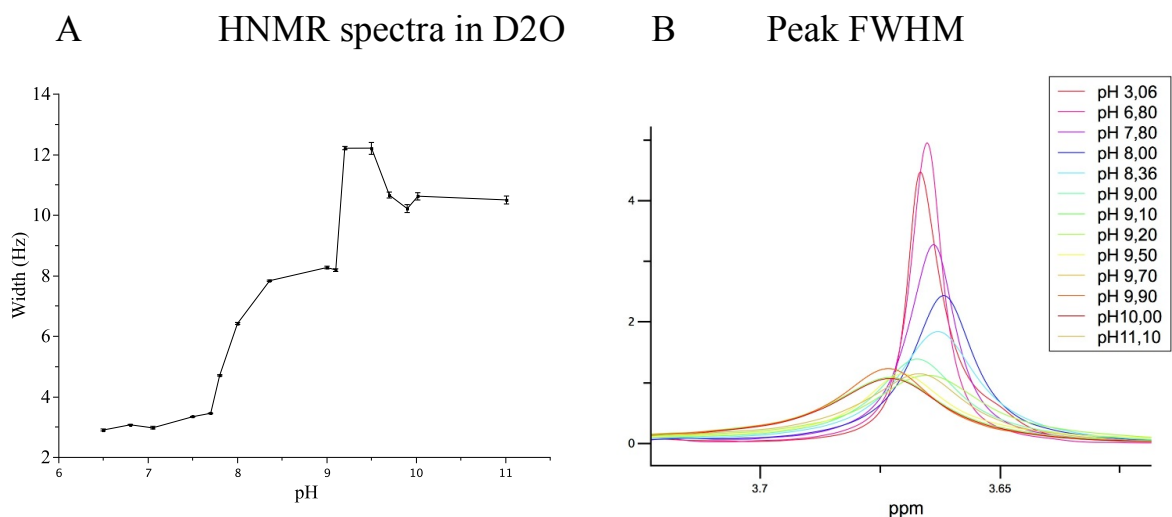

**Figure S3. Ce (III)-EG coordination depends on pH.** (A)  $^1\text{H}$ -NMR spectra of EG peak at 3.66 ppm varying the pH from 3 to 11. (B) Dependence of peak full width at half maximum (FWHM) on the pH.

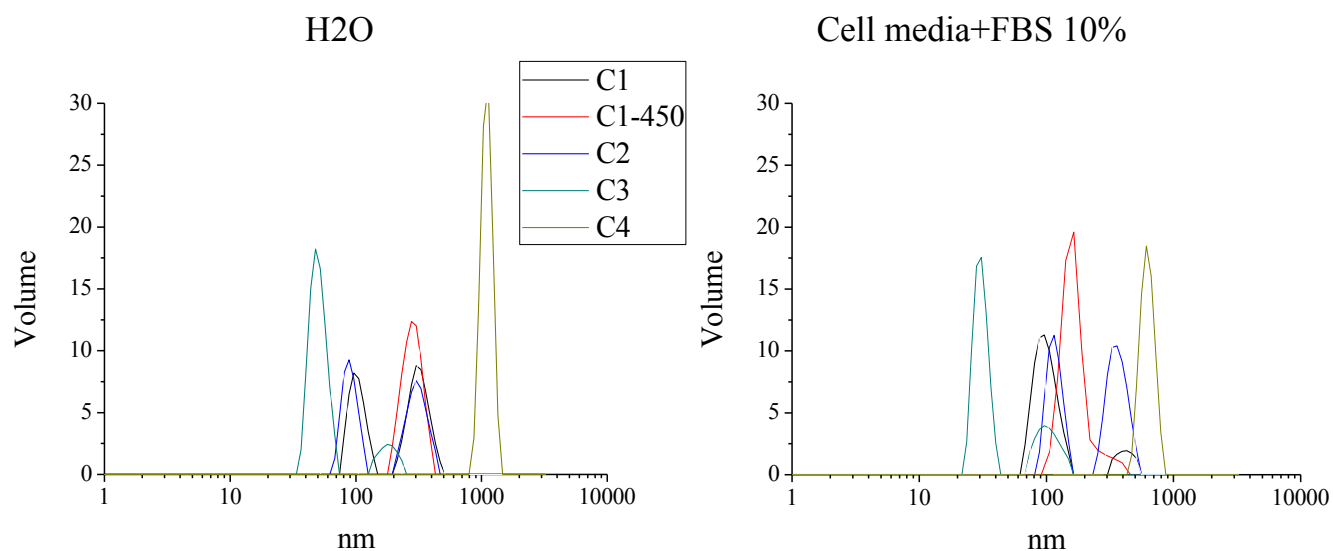

**Figure S4. CNP dispersion properties.** DLS analysis of C1, C1-450, C2, C3, and C4 at 200  $\mu\text{g}/\text{mL}$  in water (pH 7.4) and in RPMI media +10% fetal bovine serum (FBS). The hydrodynamic diameter distribution by volume is reported.

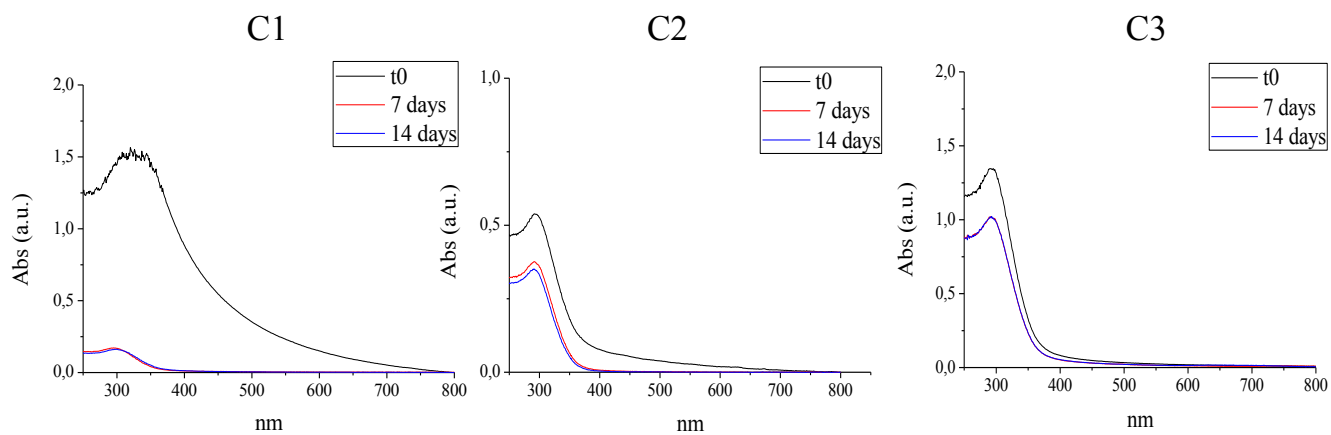

**Figure S5. CNP precipitation analysis over time.** Time dependent variation of CNPs UV-VIS supernatant spectra after 7 days (red curve) and 14 days (blue curve) compared with CNP spectra immediately after sonication (black curve). CNP nominal concentration was set at 50  $\mu\text{g/mL}$ .

### A TEMPOL/TEMPONE system

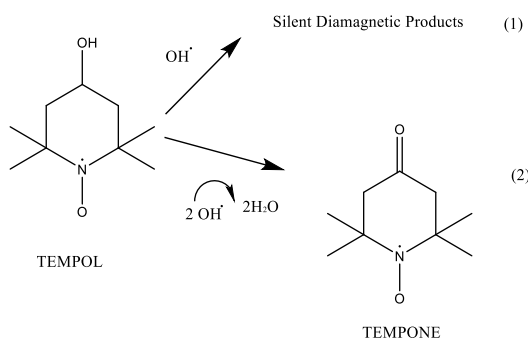

### B TEMPOL/ TEMPONE ratio 1:1

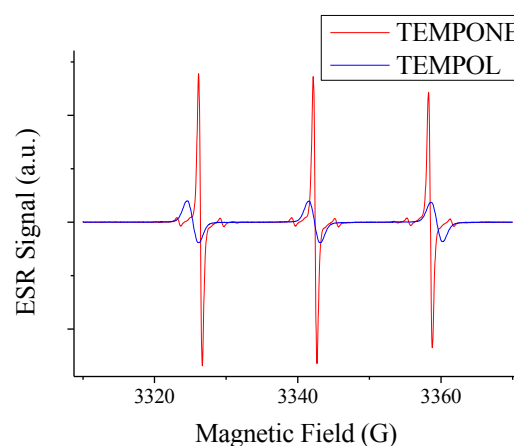

### C ESR spectra after 525 s

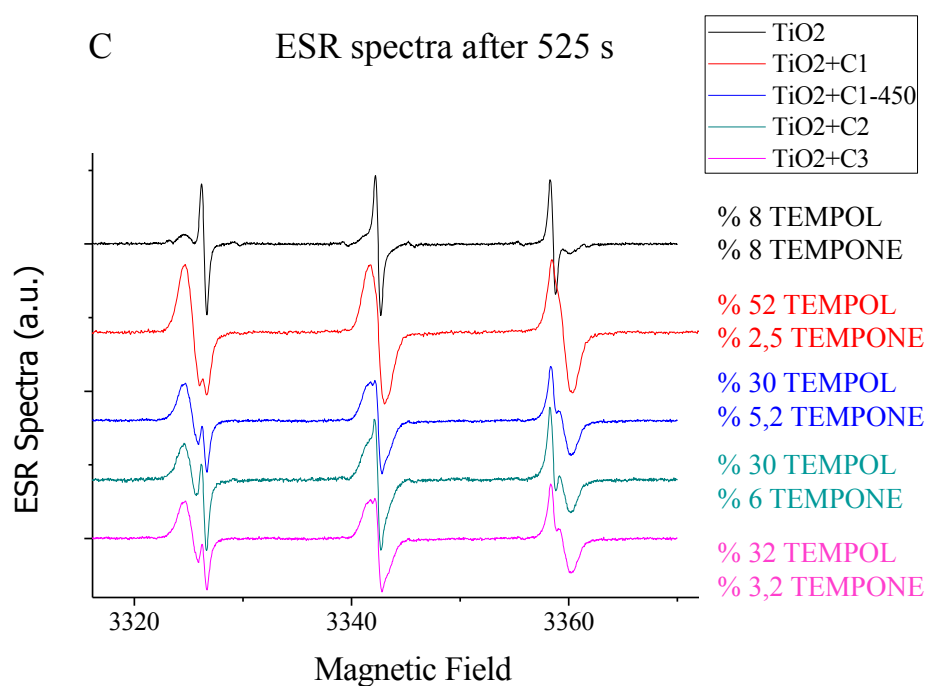

**Figure S6. TEMPOL/TEMPONE ESR system.** (A) Scheme of TEMPOL degradation by HO<sup>•</sup> producing diamagnetic products (reaction 1), and paramagnetic TEMPONE species (reaction 2). (B) Simulation of TEMPOL (blue curve) and TEMPONE (red curve) ESR spectra (TEMPOL: TEMPONE ratio 1:1). TEMPOL spectra is shifted to the right by 0.035 G. (C) ESR spectra of 100 μM TEMPOL after 525 s of continuous production of HO<sup>•</sup> ± (C1, C1-450, C2 and C3 samples) as described in Methods section. For each spectra the quantification of TEMPOL and TEMPONE signals are reported in the bottom right.

## Protection from VP16 induced apoptosis

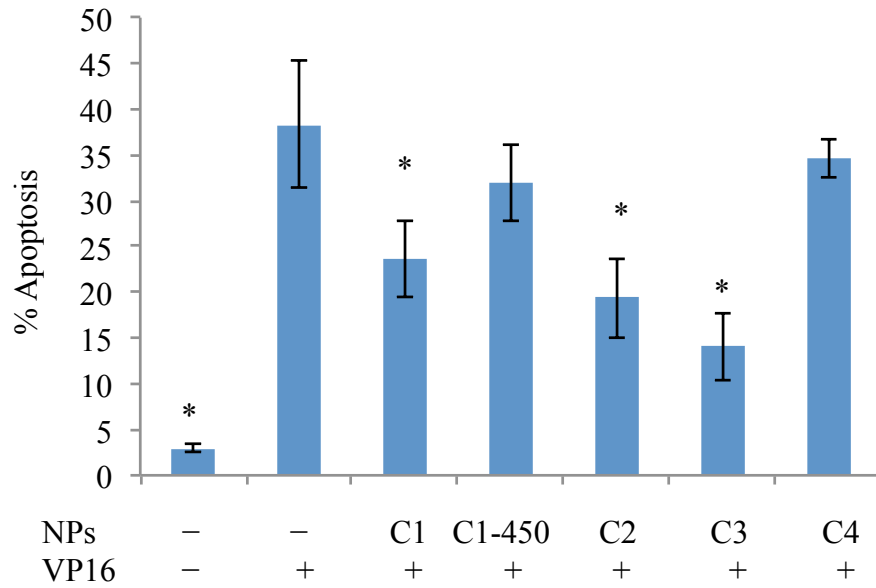

**Figure S7. Redox active CNPs reduce redox dependent apoptosis.** % of apoptosis detected 3 h after cell treatment with VP16 ± CNPs. Values are the mean of  $\geq 3$  independent experiments  $\pm$  SD; \* $p < 0.05$  (ANOVA). Significance with respect to the control group is shown.
